# Supplementary material for: Evaluation of functional layers thinning of high temperature polymer electrolyte membrane fuel cells after long term operation
Source: Royal Society of Chemistry journal article supplement (doi:10.1039/d2nr02892a), 2022-01-01
Supplement: d2nr02892a1.pdf [file d2nr02892a1.pdf]

Supporting Information for:

# Evaluation of Functional Layers Thinning of High Temperature Polymer Electrolyte Membrane Fuel Cells after Long Term Operation

Miquel Vega Paredes<sup>1,+</sup>, Alba Garzón Manjón<sup>1,+,\*</sup>, Bjoern Hill<sup>1,§</sup>, Torsten Schwarz<sup>1</sup>, Nicolas A. Rivas<sup>1</sup>, Tilman Jurzinsky<sup>2</sup>, Katharina Hengge<sup>2</sup>, Florian Mack<sup>2</sup>, Christina Scheu<sup>1\*</sup>

<sup>1</sup> Max-Planck-Institut für Eisenforschung GmbH, Max-Planck-Straße 1, 40237 Düsseldorf, Germany.

<sup>2</sup> Freudenberg Fuel Cell e-Power Systems GmbH, Bayerwaldstraße 3, 81737 München, Germany.

+ Equal contribution

§ Present address: Physical Chemistry II department. Faculty of chemistry and biochemistry, Ruhr Universität Bochum, Universitätsstraße 150, 44801 Bochum , Germany.

Corresponding authors\*: [a.garzon@mpie.de](mailto:a.garzon@mpie.de)

[c.scheu@mpie.de](mailto:c.scheu@mpie.de)

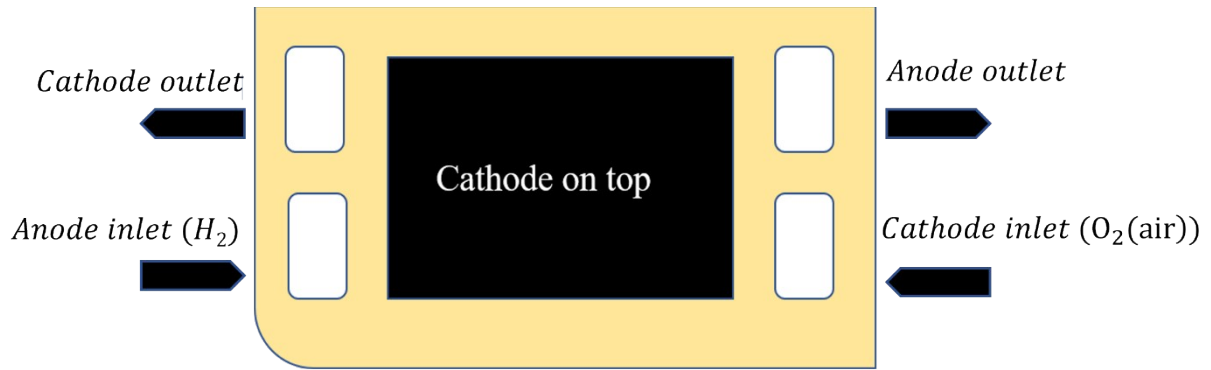

Figure S11: Top view scheme of HT-PEMFC.  $O_2$  is feed from top (cathode) and  $H_2$  is feed from bottom (anode). The gas in-/out-let pipes are through the cutouts in the frame (left and right).

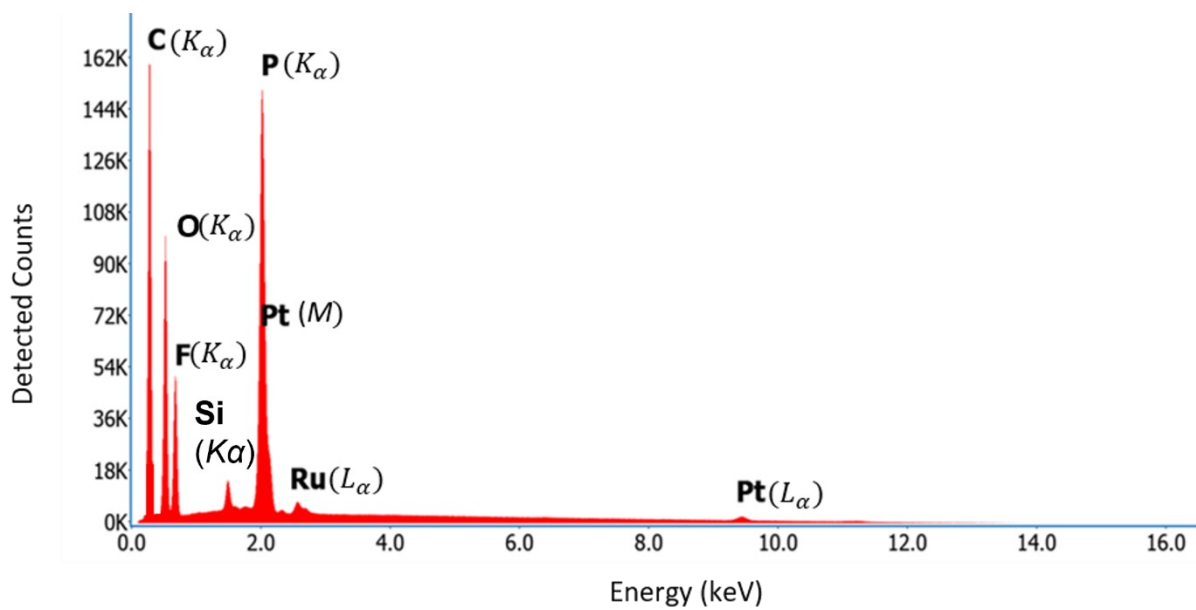

Figure S12: EDX spectrum of HT\_non\_operated cell shows the presence of C, O, F, P, Pt and Ru.

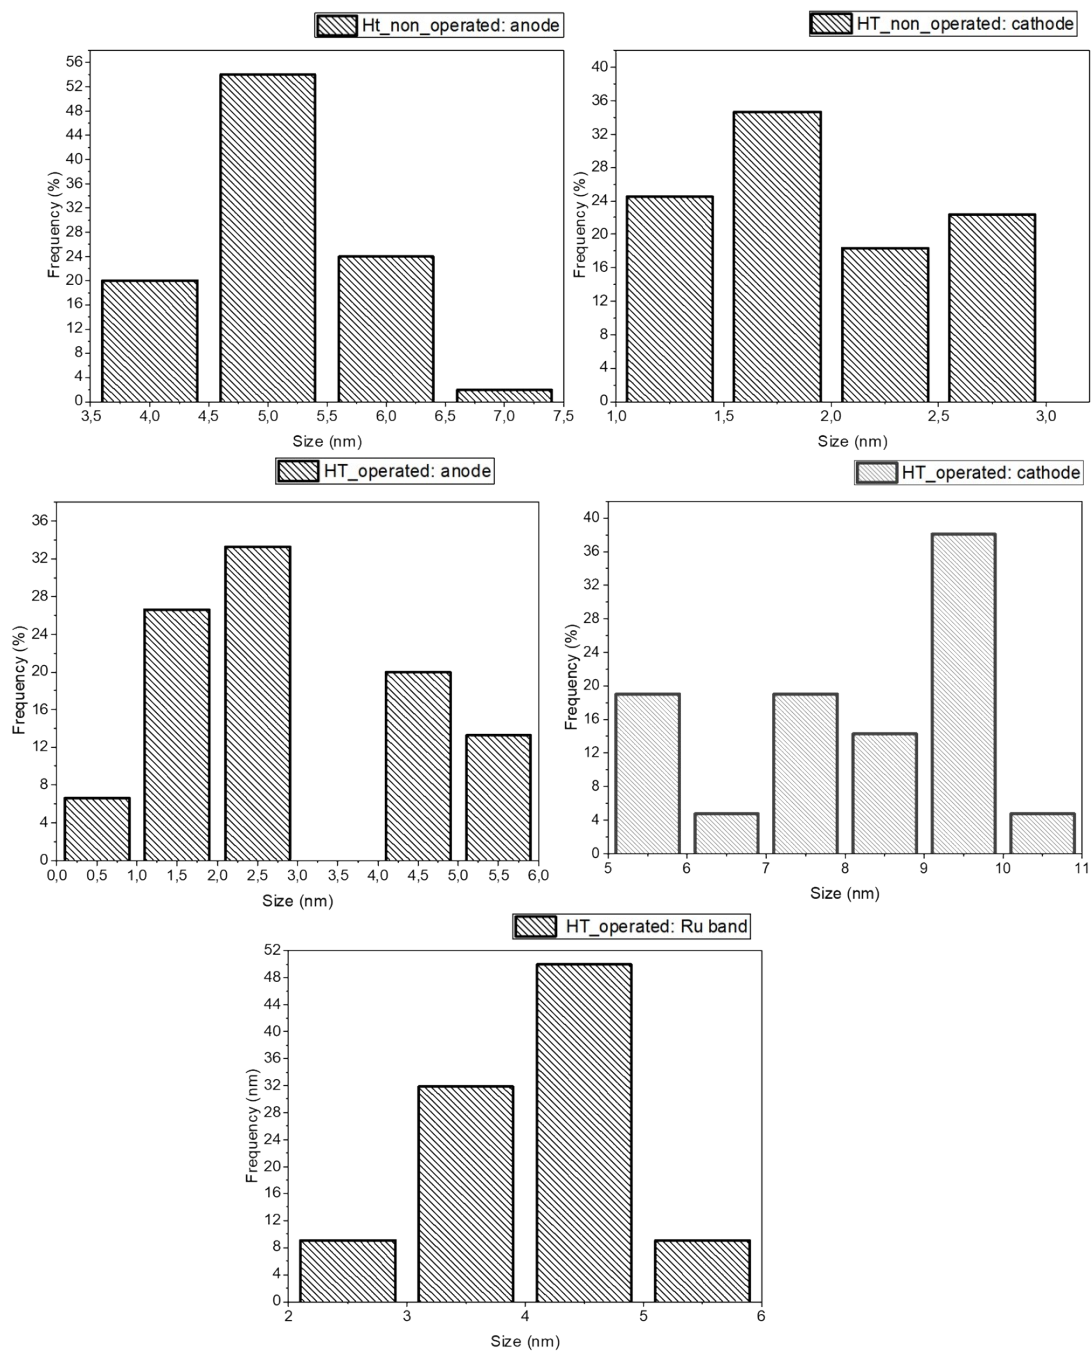

Figure S13: Size distribution of the catalytic nanoparticles before and after operation.
